# Supplementary material
Source: publisher figshare collection journal article supplement (https://acs.figshare.com/ndownloader/files/25437732)
Supplement: Supplementary file 1 [file 25437732]

## Supporting Information

### INDUCTION OF IMMUNOGENIC CELL DEATH IN BREAST CANCER BY CONDUCTIVE POLYMER NANOPARTICLE-MEDIATED PHOTOTHERMAL THERAPY

Madeline Elaine Huff,<sup>1,#</sup> Fatma Özge Gökmen,<sup>1,2,#</sup> Jessica Barrera,<sup>1</sup> Emilio J. Lara,<sup>1</sup>  
James Tunnell,<sup>3</sup> Jennifer Irvin,<sup>1,4</sup> Tania Betancourt<sup>1,4\*</sup>

<sup>1</sup> Department of Chemistry and Biochemistry, Texas State University, San Marcos, TX, USA

<sup>2</sup> Central Research Laboratory, Bilecik Seyh Edebali University, Bilecik, Turkey

<sup>3</sup> Department of Biomedical Engineering, The University of Texas at Austin, Austin, TX, USA

<sup>4</sup> Materials Science, Engineering and Commercialization Program, Texas State University, San Marcos, TX, USA

# Coauthors Huff and Gökmen contributed equally to this work

\* Corresponding Author

Tania Betancourt

Department of Chemistry and Biochemistry

Texas State University

601 University Drive

San Marcos, TX 78666

(512) 245-7703

[Tania.betancourt@txstate.edu](mailto:Tania.betancourt@txstate.edu)

## S.1 Supplemental Figures

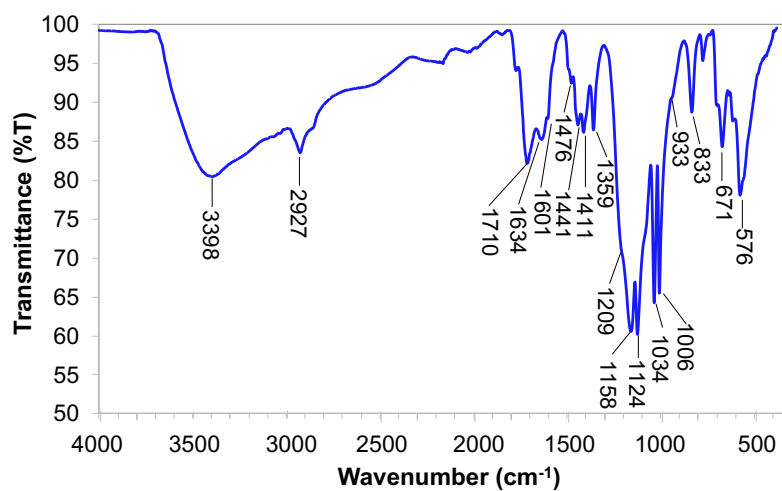

**Figure S1.** FTIR spectrum of NPs.

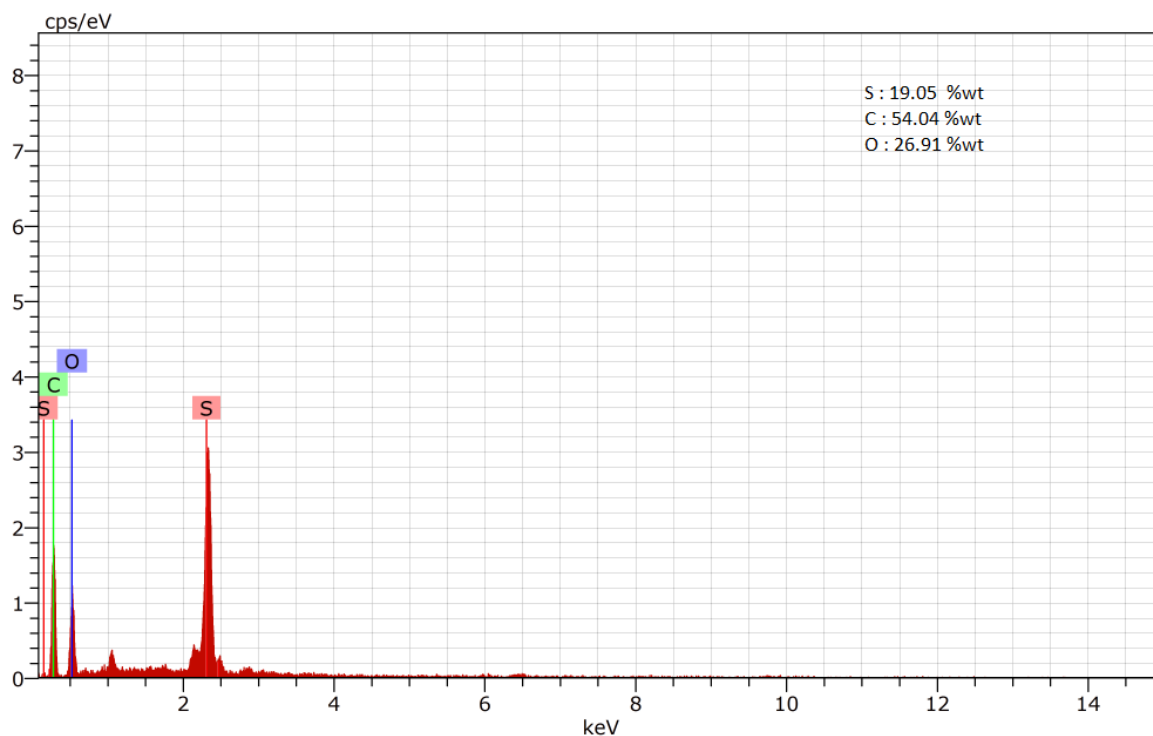

**Figure S2.** EDX spectra of PEDOT NPs showing the presence of the elements C, O, and S, as expected for NPs containing PEDOT and the anionic surfactants PSS-co-MA and DBSA.

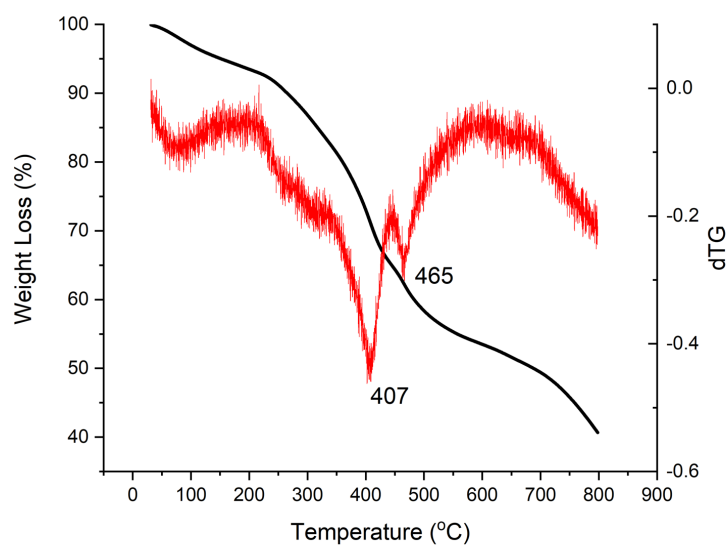

**Figure S3.** TGA (black) and dTG (red) curves of PEDOT NPs. Heating was carried out in the temperature range of 30–800 °C at a heating rate of 5 °C min<sup>-1</sup> in a N<sub>2</sub> atmosphere.

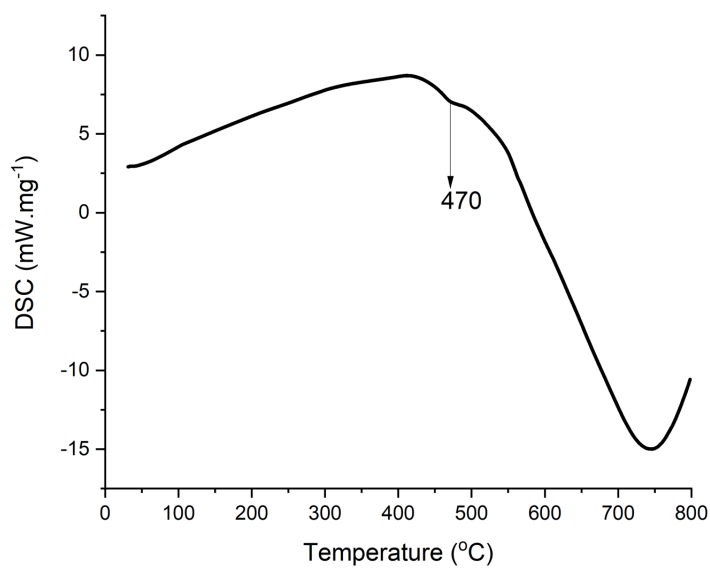

**Figure S4.** DSC curve of PEDOT NPs

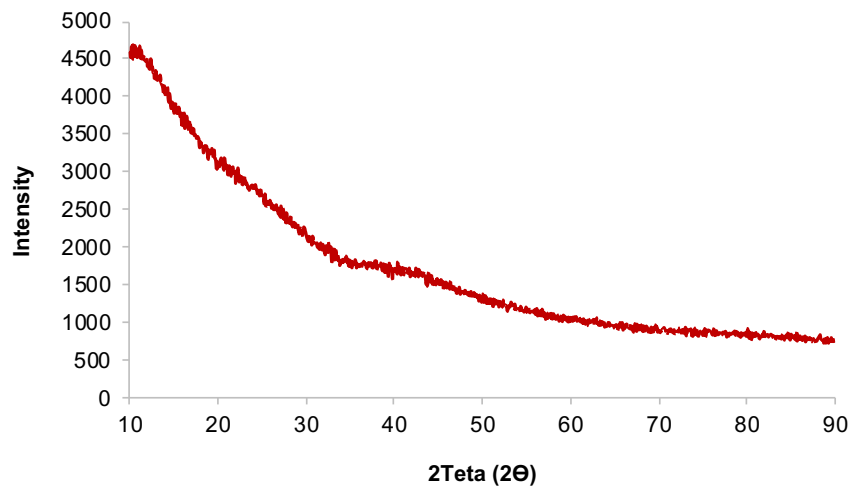

**Figure S5.** XRD pattern of PEDOT NPs

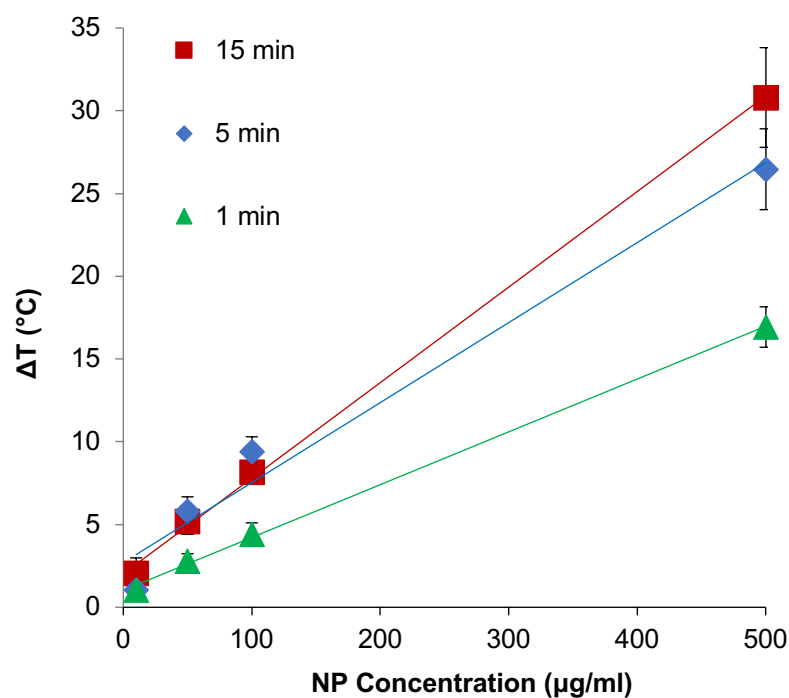

**Figure S6.** Temperature rise as a function of NP concentration upon laser irradiation for different time periods. Linear trendlines ( $r^2 \geq 0.98$ ) were used to fit the experimental data (bullets). Experiments were performed in triplicate. Error bars represent the standard deviation between replicates.

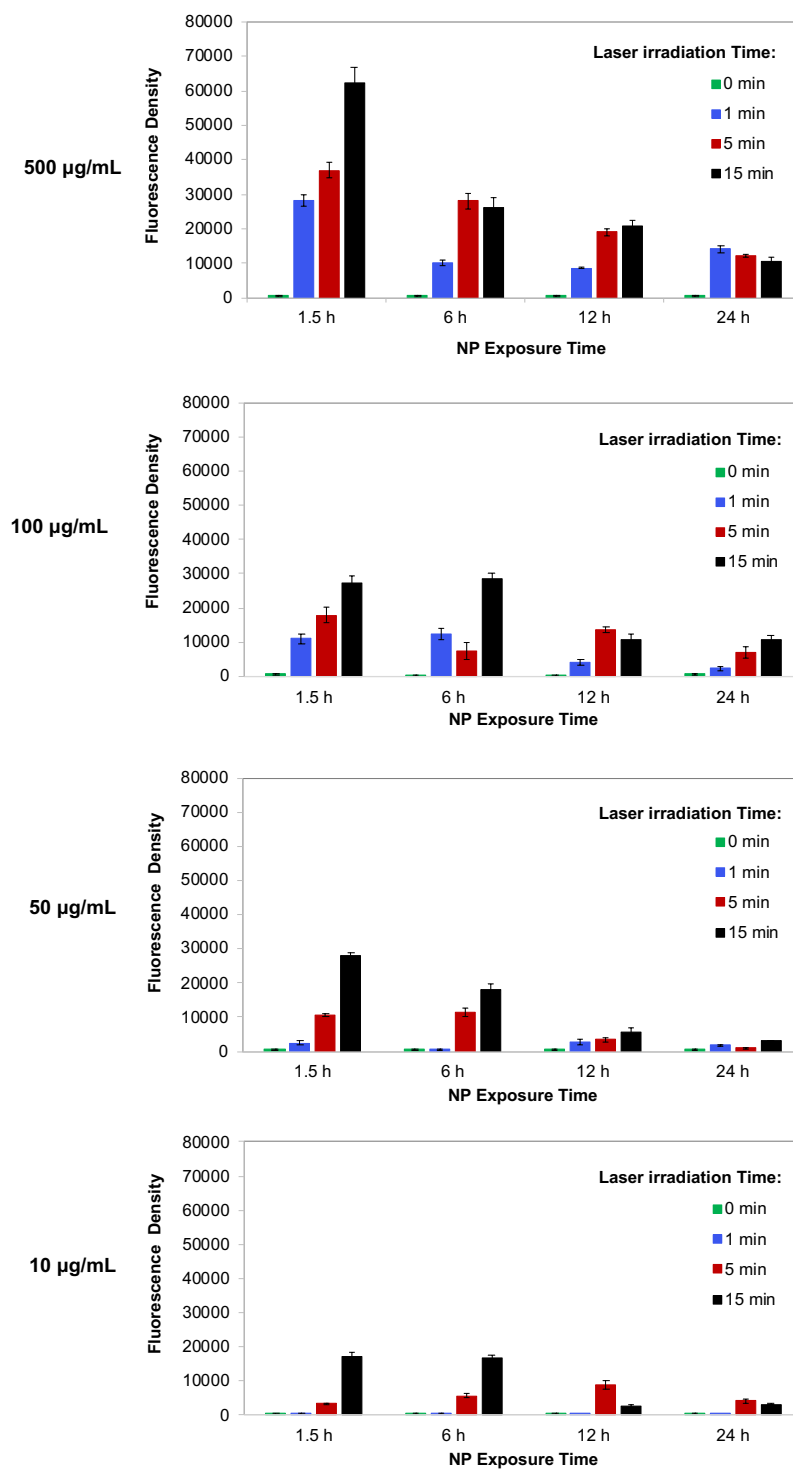

**Figure S7.** Fluorescence density indicative of caspase-3/7 expression for cells treated with PEDOT NP-mediated PTT. Standard deviations (error bars) were calculated from 4 separate images of each variable as a function of the NP exposure time. Fluorescence intensity quantification of microscopy images was performed using ImageJ.

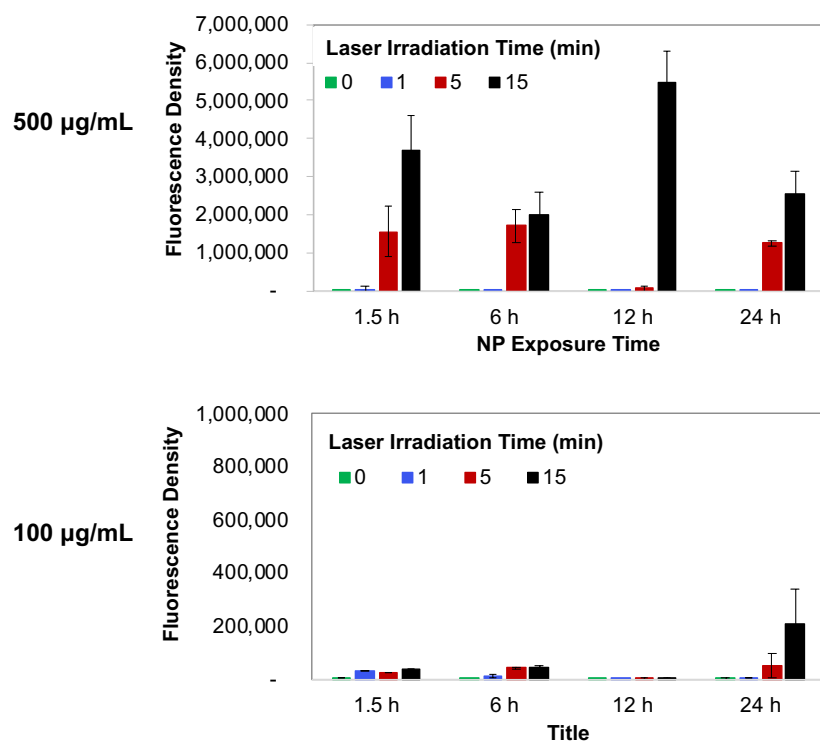

**Figure S8.** Fluorescence density, indicative of calreticulin presentation, of cells treated with PEDOT NP-mediated PTT. Standard deviations were calculated from separate images ( $n \geq 3$ ) of each condition. Fluorescence intensity quantification of microscopy images was performed using ImageJ. Note different scales used in the y axis of both plots. Fluorescence densities for cell exposed to 50 and 10 µg/mL were very low ( $< 200$ ).

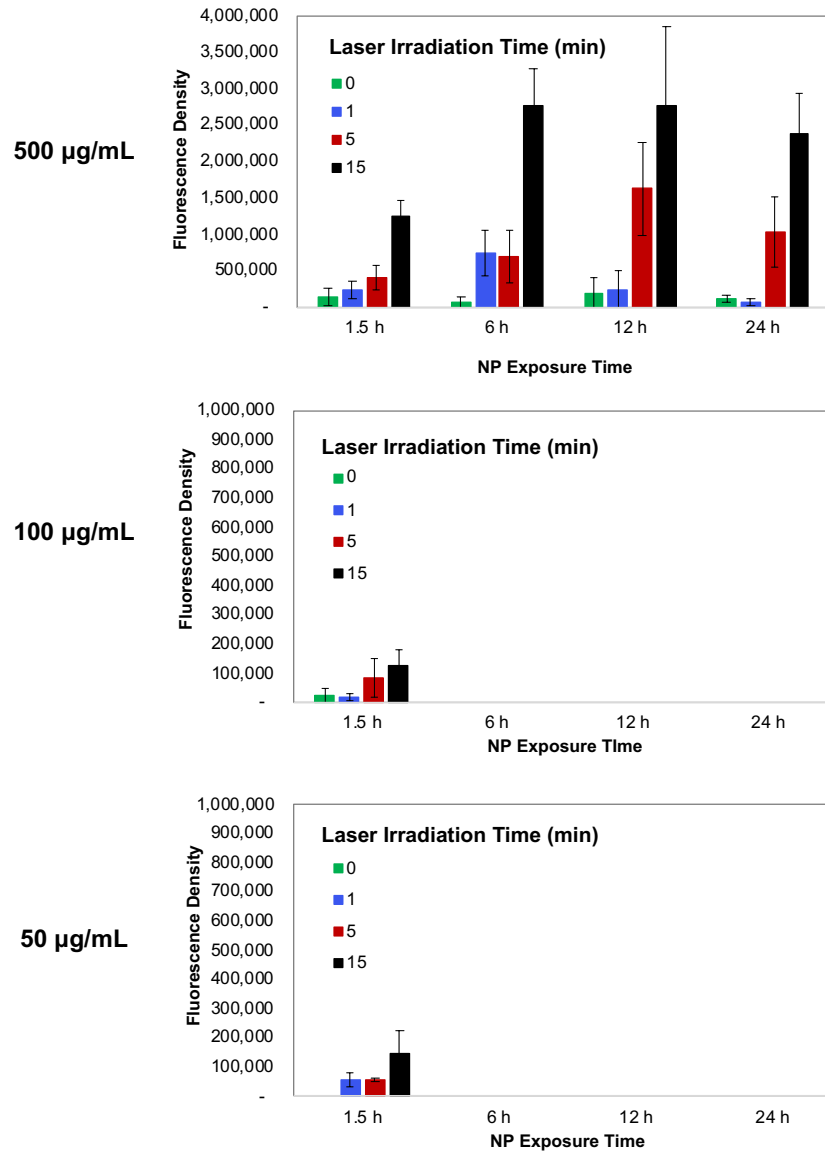

**Figure S9.** Fluorescence density indicative of HMGB1 presentation on the membrane of cells treated with PEDOT NP-mediated PTT. Standard deviations (error bars) were calculated from separate images ( $n \geq 3$ ) of each condition. Fluorescence intensity quantification of microscopy images was performed using ImageJ. Note different scales used in the y axis of plots. Fluorescence densities for cell exposed to 10 µg/mL were close to zero.

## S.2 Determination of Cumulative Equivalent Minutes at 43°C (CEM43)

CEM43 was calculated from the temperature elevation achieved over the time of irradiation of the NPs (data in Figure 3A) using the following equation:

$$\text{CEM43} = t R^{(43-T)} \quad \text{Equation 1}$$

where  $t$  represents a time interval in minutes,  $T$  the average temperature for a given time interval, and  $R = 0.25$  for  $T < 43^\circ\text{C}$  or  $R = 0.5$  for  $T > 43^\circ\text{C}$ . The resulting CEM43 values can be seen in Table S.1. below.

**Table S.1.** CEM43 of Thermal Conditions Used

| <b>Laser<br/>Irradiation<br/>Time</b> | <b>CEM43<br/>Measure</b> | <b>500 µg/mL</b>  | <b>100 µg/mL</b> | <b>50 µg/mL</b> | <b>10 µg/mL</b>      |
|---------------------------------------|--------------------------|-------------------|------------------|-----------------|----------------------|
| <b>15 min</b>                         | CEM43                    | $3.0 \times 10^8$ | 96.5             | 8.7             | 0.10                 |
|                                       | logCEM43                 | 8.5               | 2.0              | 0.90            | -1.0                 |
| <b>5 min</b>                          | CEM43                    | $3.1 \times 10^6$ | 14.3             | 0.51            | 0.010                |
|                                       | logCEM43                 | 6.5               | 1.16             | -0.29           | -3.0                 |
| <b>1 min</b>                          | CEM43                    | 3.9               | 0.003            | 0.002           | $4.3 \times 10^{-4}$ |
|                                       | logCEM43                 | 0.6               | -2.5             | -2.7            | -3.4                 |
